# Supplementary material for: A microfluidic platform integrating dynamic cell culture and dielectrophoretic manipulation for in situ assessment of endothelial cell mechanics
Source: Royal Society of Chemistry journal article supplement (doi:10.1039/d3lc00363a), 2023-01-01
Supplement: d3lc00363a1.pdf [file d3lc00363a1.pdf]

## Supplementary information

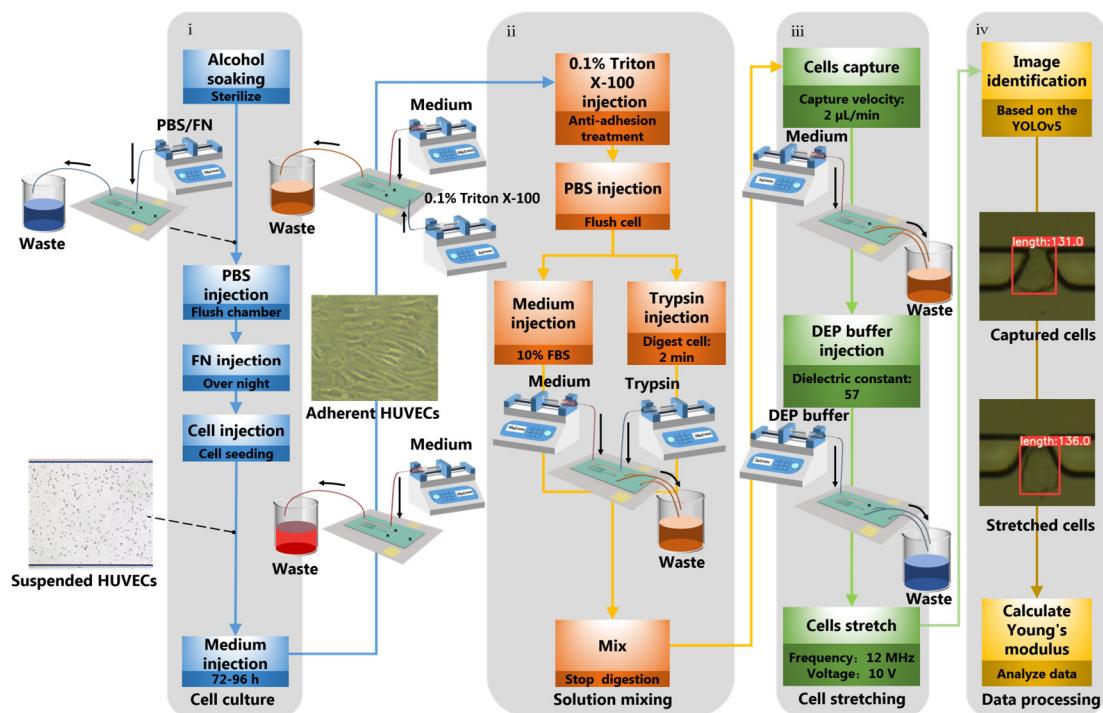

**Figure S1.** Detailed schematic illustration of experimental operation. It can be divided into four steps: cell culture, solution mixing, cell stretching, and subsequent processing of experimental results.
